# Supplementary material
Source: publisher figshare collection journal article supplement (https://frontiersin.figshare.com/ndownloader/files/17392436)
Supplement: Supplementary file [file 17392436]

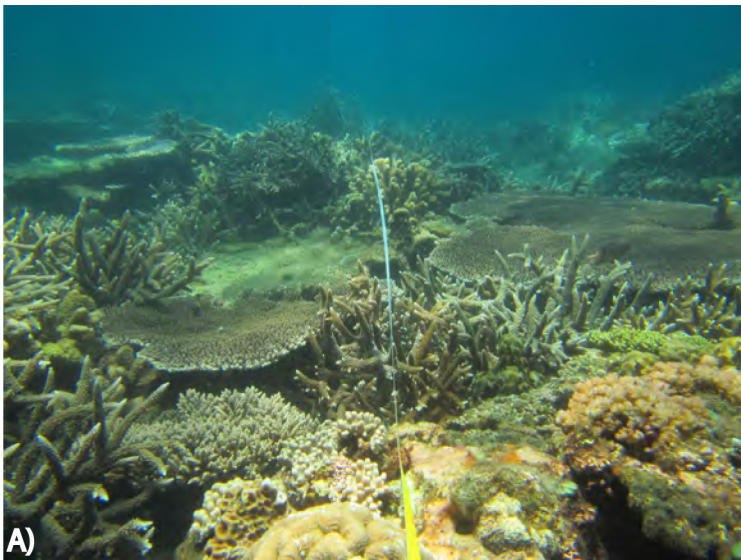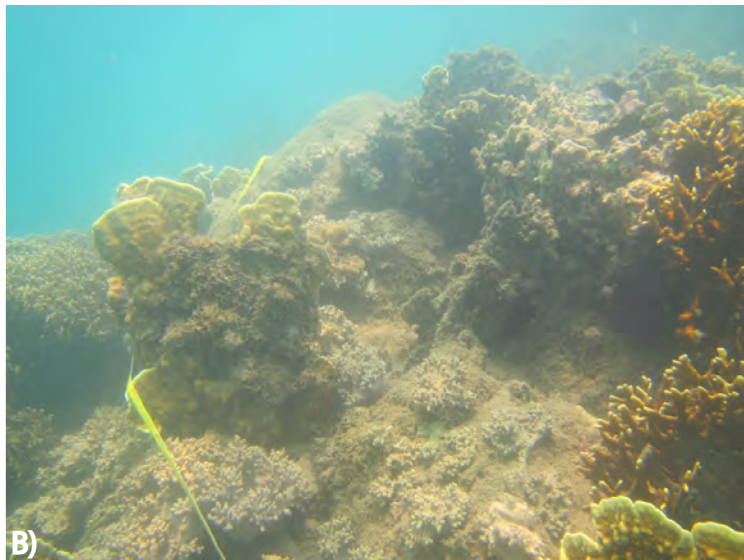

**Figure S1** Pictures of representative transects from the well-preserved (A) and impacted (B) environments.
